# Supplementary material for: Full-length model of the human galectin-4 and insights into dynamics of inter-domain communication
Source: PubMed Central journal article supplement (PMC5027518; doi:10.1038/srep33633), 2016-09-19
Supplement: srep33633-s1.pdf [file srep33633-s1.pdf]

## Supplementary information

Full-length model of the human galectin-4 and insights into dynamics of inter-domain communication

Joane K Rustiguel<sup>1</sup>, Ricardo O S Soares<sup>1</sup>, Steve P Meisburger<sup>2</sup>, Katherine M Davis<sup>2</sup>, Kristina L Malzbender<sup>2</sup>, Nozomi Ando<sup>2</sup>, Marcelo Dias-Baruffi<sup>3</sup>, & M. Cristina Nonato<sup>1\*</sup>

<sup>1</sup>Laboratório de Cristalografia de Proteínas, Faculdade de Ciências Farmacêuticas de Ribeirão Preto, Universidade de São Paulo, SP, Brazil

<sup>2</sup>Department of Chemistry, Princeton University, Princeton, NJ, USA

<sup>3</sup>Departamento de Análises Clínicas, Toxicológicas e Bromatológicas, Faculdade de Ciências Farmacêuticas de Ribeirão Preto, Universidade de São Paulo, SP, Brazil

\*corresponding author [cristy@fcfrp.usp.br](mailto:cristy@fcfrp.usp.br)

## Supplementary Table S1

Solubility and stability screen compounds.

Description of compounds from Solubility and Stability screen kit (Hampton Research) used in the thermofluor analysis of galectin-4, galectin-4N and galectin-4C with the respective thermal shift values or transition curve profile.

|    |     | <i>Category</i>       | <i>Compound description</i>                                          | <i>ΔTm (°C)</i>   |                    |                    |
|----|-----|-----------------------|----------------------------------------------------------------------|-------------------|--------------------|--------------------|
|    |     |                       |                                                                      | <i>galectin-4</i> | <i>galectin-4N</i> | <i>galectin-4C</i> |
| 1  | REF | water control         | reference                                                            | 0.0               | 0.0                | 0.0                |
| 2  | A2  | precipitate control   | Trichloroacetic acid                                                 | -                 | -                  | -                  |
| 3  | D6  | metal                 | 50 mM Cadmium chloride hydrate/50 mM Cobalt(II) chloride hexahydrate | -13.66            | -                  | -32.44             |
| 4  | E9  | ionic liquid          | 12.5% w/v 1-Butyl-3-methylimidazolium chloride                       | -12.24            | -                  | -                  |
| 5  | C6  | linker                | 250 mM Ethylenediamine dihydrochloride                               | -10.69            | -                  | -15.41             |
| 6  | A11 | amino acid/derivative | 250 mM L-Argininamide dihydrochloride                                | -9.96             | -                  | -13.12             |
| 7  | D4  | chelator              | 25 mM Ethylenediaminetetraacetic acid disodium salt dihydrate        | -9.04             | -                  | -9.56              |
| 8  | E10 | ionic liquid          | 12.5% w/v Ethylammonium nitrate                                      | -9.00             | -                  | -16.89             |
| 9  | C2  | polyamine             | 250 mM Spermidine                                                    | -8.02             | -                  | -18.32             |
| 10 | E6  | ionic liquid          | 12.5% w/v Tetraethylammonium bromide                                 | -7.71             | -                  | -10.2              |
| 11 | F11 | salt                  | 125 mM Sodium p-toluenesulfonate                                     | -7.69             | -                  | -16.5              |
| 12 | E8  | ionic liquid          | 12.5% w/v 1-Ethyl-3-methylimidazolium acetate                        | -6.97             | -                  | -6.9               |
| 13 | D3  | inhibitor             | 2.5% w/v Benzamidine hydrochloride                                   | -6.23             | -7.8               | -9.05              |
| 14 | D11 | non detergent         | 400 mM Non Detergent Sulfobetaine 256 (NDSB-256)                     | -6.16             | -                  | -8.05              |
| 15 | F2  | salt                  | 250 mM Potassium thiocyanate                                         | -5.54             | -5.8               | -13.55             |
| 16 | H2  | polyol                | 12.5% v/v Pentaerythritol ethoxylate (15/4 EO/OH)                    | -4.2              | -                  | -                  |
| 17 | C3  | linker                | 250 mM 5-Aminovaleric acid                                           | -4.09             | -0.15              | -2.67              |
| 18 | C7  | chaotrope             | 250 mM Guanidine hydrochloride                                       | -3.26             | -4.45              | -8.09              |
| 19 | F10 | salt                  | 125 mM Sodium benzenesulfonate                                       | -2.82             | -5.69              | -12.18             |
| 20 | C1  | polyamine             | 250 mM Spermine tetrahydrochloride                                   | -2.09             | -6.3               | -11.93             |
| 21 | G11 | polyol                | 2.5% w/v Polyethylene glycol monomethyl ether 750                    | -1.98             | -4.3               | -3.57              |

|    |     |                       |                                                                       |       |       |       |
|----|-----|-----------------------|-----------------------------------------------------------------------|-------|-------|-------|
| 22 | D10 | non detergent         | 500 mM Non Detergent Sulfbetaine 221 (NDSB-221)                       | -1.88 | -4.3  | -2.6  |
| 23 | H3  | polyol                | 5% w/v 1,2-Propanediol                                                | -1.8  | -3.07 | -4.11 |
| 24 | F6  | salt                  | 250 mM Lithium nitrate                                                | -1.75 | -2.98 | -9.41 |
| 25 | B1  | peptide               | 250 mM Gly-gly                                                        | -1.57 | -2.39 | -1.3  |
| 26 | C9  | chaotrope             | 250 mM N-Methylurea                                                   | -1.51 | -2.8  | -4.18 |
| 27 | B2  | peptide               | 100 mM Gly-gly-gly                                                    | -1.33 | -2.47 | -2.6  |
| 28 | E12 | salt                  | 250 mM Ammonium chloride                                              | -1.28 | -2.71 | -6.81 |
| 29 | E1  | organic acid          | 250 mM Acetamide                                                      | -1.27 | -2.51 | -3.13 |
| 30 | G9  | polyol                | 5% v/v Polyethylene glycol 200                                        | -1.26 | -3.6  | -3.16 |
| 31 | B12 | osmolyte              | 5% v/v Triethylene glycol                                             | -1.25 | -2.83 | -1.89 |
| 32 | D5  | metal                 | 50 mM Magnesium chloride hexahydrate/50 mM Calcium chloride dihydrate | -1.16 | -2.74 | -7.23 |
| 33 | C10 | chaotrope             | 100 mM N-Ethylurea                                                    | -1.11 | -2.28 | -4.34 |
| 34 | G10 | polyol                | 2.5% w/v Polyethylene glycol monomethyl ether 550                     | -1.06 | -2.5  | -4.24 |
| 35 | G5  | salt                  | 500 mM Sodium bromide                                                 | -0.92 | -1.96 | -8.76 |
| 36 | E7  | ionic liquid          | 12.5% w/v Cholin acetate                                              | -0.81 | -1.86 | -3.72 |
| 37 | C8  | chaotrope             | 250 mM Urea                                                           | -0.77 | -1.83 | -3.57 |
| 38 | B3  | peptide               | 2.5% w/v Tryptone                                                     | -0.56 | -1.75 | -6.38 |
| 39 | G8  | polyol                | 5% v/v Ethylene glycol                                                | -0.44 | -1.94 | -2.96 |
| 40 | D12 | organic acid          | 250 mM Taurine                                                        | -0.43 | -1.09 | -0.87 |
| 41 | F9  | salt                  | 125 mM Ammonium acetate                                               | -0.38 | -1.72 | -4.45 |
| 42 | H4  | polymer               | 1.5% w/v Polyethylene glycol monomethyl ether 1,900                   | -0.3  | -1.48 | -3.51 |
| 43 | D7  | non detergent         | 500 mM Non Detergent Sulfbetaine 195 (NDSB-195)                       | -0.28 | -1.65 | -1.11 |
| 44 | H6  | polymer               | 1.5% w/v Polyethylene glycol 8,000                                    | -0.3  | -1.59 | -3.7  |
| 45 | F4  | salt                  | 125 mM Cesium chloride                                                | -0.23 | -1.11 | -5.66 |
| 46 | H5  | polymer               | 1.5 % w/v Polyethylene glycol 3,350                                   | -0.1  | -1.33 | -3.12 |
| 47 | F5  | salt                  | 125 mM 4-Aminobutyric acid (GABA)                                     | -0.01 | -0.62 | -     |
| 48 | H7  | polymer               | 1% w/v Polyvinylpyrrolidone K15                                       | 0.0   | -1.4  | -3.11 |
| 49 | G4  | salt                  | 700 mM Lithium chloride                                               | 0.06  | -0.44 | -7.45 |
| 50 | A4  | amino acid/derivative | 125 mM L-Arginine/125 mM L-Glutamic acid                              | 0.18  | -0.7  | -2.23 |
| 51 | A12 | amino acid/derivative | 250 mM 6-Aminohexanoic acid                                           | 0.20  | -0.15 | -0.73 |
| 52 | A6  | amino acid/derivative | 250 mM L-Proline                                                      | 0.35  | -0.57 | -1.51 |
| 53 | E11 | salt                  | 250 mM Ammonium sulphate                                              | 0.35  | -0.34 | -5.05 |

|    |     |                       |                                                                                  |       |       |       |
|----|-----|-----------------------|----------------------------------------------------------------------------------|-------|-------|-------|
| 54 | D9  | non detergent         | 500 mM Non Detergent Sulfbobetaine 211 (NDSB-211)                                | 0.53  | -0.72 | -0.63 |
| 55 | A7  | amino acid/derivative | 60 mM L-Histidine                                                                | 0.56  | -0.42 | -2.27 |
| 56 | G1  | salt                  | 700 mM Potassium chloride                                                        | 0.56  | -0.28 | -5.63 |
| 57 | A9  | amino acid/derivative | 250 mM L-Serine                                                                  | 0.70  | -0.22 | -1.4  |
| 58 | B9  | osmolyte              | 250 mM Hydroxyectoine                                                            | 0.88  | -0.28 | -2.22 |
| 59 | E5  | organic acid          | 2.5% v/v Tacsimate pH 7.0                                                        | 0.76  | -0.2  | -3.95 |
| 60 | F12 | salt                  | 500 mM Sodium chloride                                                           | -0.01 | 0.14  | -5.41 |
| 61 | F1  | salt                  | 250 mM Magnesium sulphate hydrate                                                | 0.52  | 0.39  | -4.15 |
| 62 | A8  | amino acid/derivative | 250 mM $\beta$ -Alanine                                                          | 0.74  | 0.1   | -1.67 |
| 63 | A5  | amino acid/derivative | 250 mM Glycine                                                                   | 0.80  | 0.33  | -1.65 |
| 64 | A3  | amino acid/derivative | 125 mM L-Arginine                                                                | 0.91  | 0.06  | -7.97 |
| 65 | E4  | organic acid          | 250 mM Succinic acid pH 7.0                                                      | 1.25  | 1.48  | -3.88 |
| 66 | F7  | salt                  | 250 mM DL-Malic acid pH 7.0                                                      | 1.50  | 1.51  | -4.12 |
| 67 | G2  | salt                  | 350 mM Sodium phosphate monobasic monohydrate/650 mM potassium phosphate dibasic | 1.58  | 7.21  | -4.74 |
| 68 | E3  | organic acid          | 250 mM Sodium malonate pH 7.0                                                    | 1.62  | 1.83  | -3.17 |
| 69 | B11 | osmolyte              | 1000 mM Methyl- $\alpha$ -D-glucopyranoside                                      | 1.78  | 0.64  | -0.05 |
| 70 | F8  | salt                  | 250 mM Lithium citrate tribasic tetrahydrate                                     | 2.42  | 2.63  | -3.08 |
| 71 | G3  | salt                  | 500 mM Sodium sulphate decahydrate                                               | 2.60  | 5.15  | -4.8  |
| 72 | B4  | osmolyte              | 1250 mM Betaine monohydrate                                                      | 1.66  | 0.62  | 2.48  |
| 73 | B10 | osmolyte              | 1250 mM Trimethylamine N-oxide dihydrate                                         | 3.06  | 3.13  | 1.31  |
| 74 | G6  | polyol and salt       | 20% v/v Glycerol/200 mM lithium chloride                                         | 3.53  | 1.66  | 0.3   |
| 75 | B5  | osmolyte              | 375 mM D-(+)-Trehalose dihydrate                                                 | 3.73  | 2.73  | 1.14  |
| 76 | G7  | polyol                | 25% v/v Glycerol                                                                 | 4.36  | 2.5   | 2.42  |
| 77 | B7  | osmolyte              | 1000 mM D-Sorbitol                                                               | 4.42  | 3.45  | 2.42  |
| 78 | B6  | osmolyte              | 1000 mM Xylitol                                                                  | 4.71  | 3.35  | 2.22  |
| 79 | B8  | osmolyte              | 1000 mM Sucrose                                                                  | 7.42  | 6.23  | 5.48  |
| 80 | H1  | polyol                | 25% v/v Polypropylene glycol P 400                                               | 8.5   | -     | -     |
| 81 | H8  | cyclodextrin          | 50 mM 6-O- $\alpha$ -D-Maltosyl- $\beta$ -cyclodextrin                           | -     | -     | -     |
| 82 | H9  | cyclodextrin          | 5 mM (2-Hydroxypropyl)- $\beta$ -cyclodextrin                                    | -     | -     | -     |
| 83 | H10 | cyclodextrin          | 40 mM $\alpha$ -Cyclodextrin                                                     | -     | -     | -     |
| 84 | H11 | cyclodextrin          | 5 mM $\beta$ -Cyclodextrin                                                       | -     | -     | -     |
| 85 | H12 | cyclodextrin          | 25 mM Methyl- $\beta$ -cyclodextrin                                              | -     | -     | -     |

|    |     |                       |                                                                       |   |   |   |
|----|-----|-----------------------|-----------------------------------------------------------------------|---|---|---|
| 86 | C4  | linker                | 250 mM Glutaric acid                                                  | - | - | - |
| 87 | C5  | linker                | 40 mM Adipic acid                                                     | - | - | - |
| 88 | C11 | chaotrope             | 15% w/v N-Methylformamide                                             | - | - | - |
| 89 | C12 | chaotrope             | 1.5% w/v Hypotaurine                                                  | - | - | - |
| 90 | D1  | reducing agent        | 75 mM TCEP hydrochloride                                              | - | - | - |
| 91 | D2  | reducing agent        | 10 mM GSH (L-Glutathione reduced)/10 mM GSSG (L-Glutathione oxidized) | - | - | - |
| 92 | D8  | non detergent         | 500 mM Non Detergent Sulfobetaine 201 (NDSB-201)                      | - | - | - |
| 93 | E2  | organic acid          | 250 mM Oxalic acid dihydrate                                          | - | - | - |
| 94 | F3  | salt                  | 125 mM Gadolinium(III) chloride hexahydrate                           | - | - | - |
| 95 | G12 | polyol                | 25% v/v Formamide                                                     | - | - | - |
| 96 | A10 | amino acid/derivative | 250 mM L-Arginine ethyl ester dihydrochloride                         | - | - | - |

## Supplementary Table S2

Hydrogen bonds pairs and occupancy

Description of hydrogen bond pairs with more than 10% occupancy during 150 ns trajectories from 100 ns to 250 ns MD1 simulations and their respective occupancy at 100, 150, 200 and 250 ns.

|                              |                                |                 |                      |                  |            |            |            |
|------------------------------|--------------------------------|-----------------|----------------------|------------------|------------|------------|------------|
| MD 150 ns galectin-4         | <b>galectin-4N/linker</b>      |                 |                      | <b>time (ns)</b> |            |            |            |
|                              | <b>Donor</b>                   | <b>Acceptor</b> | <b>Occupancy (%)</b> | <b>100</b>       | <b>150</b> | <b>200</b> | <b>250</b> |
|                              | 13TYR(HH )                     | 175GLN(OE1)     | 57.5                 | 60               | 81         | 32         | 100        |
|                              | 148ASN(D22)                    | 171HIS(ND1)     | 56.1                 | 49               | 58         | 60         | 100        |
|                              | 174GLN(E22)                    | 9 TYR( O )      | 11.6                 | 2                | 2          | 30         | 100        |
|                              | 175GLN(E22)                    | 10 GLN(OE1)     | 11.3                 | 17               | 6          | 11         | 0          |
|                              |                                |                 |                      |                  |            |            |            |
|                              | <b>galectin-4C/linker</b>      |                 |                      | <b>time (ns)</b> |            |            |            |
|                              | <b>Donor</b>                   | <b>Acceptor</b> | <b>Occupancy (%)</b> | <b>100</b>       | <b>150</b> | <b>200</b> | <b>250</b> |
|                              | 177ASN( H )                    | 200GLY( O )     | 46.8                 | 53               | 61         | 27         | 100        |
|                              | 178SER( H )                    | 200GLY( O )     | 67.8                 | 72               | 81         | 51         | 0          |
|                              | 181THR(HG1)                    | 167PRO( O )     | 54.8                 | 50               | 25         | 88         | 0          |
|                              | 183GLU( H )                    | 167PRO( O )     | 29.6                 | 37               | 48         | 4          | 100        |
|                              | 203THR(HG1)                    | 175GLN( O )     | 51.2                 | 71               | 38         | 45         | 100        |
|                              |                                |                 |                      |                  |            |            |            |
|                              | <b>galectin-4N/galectin-4C</b> |                 |                      | <b>time (ns)</b> |            |            |            |
|                              | <b>Donor</b>                   | <b>Acceptor</b> | <b>Occupancy (%)</b> | <b>100</b>       | <b>150</b> | <b>200</b> | <b>250</b> |
| 14ASN(D22)                   | 207THR(OG1)                    | 18.6            | 31                   | 18               | 7          | 0          |            |
| 36GLN(E22)                   | 323ILE(OC1)                    | 13.6            | 14                   | 20               | 6          | 0          |            |
| 211LYS(HZ3)                  | 98 GLY( O )                    | 34.2            | 40                   | 38               | 24         | 0          |            |
| 322GLN(E22)                  | 101PHE( O )                    | 68.8            | 69                   | 78               | 59         | 100        |            |
|                              |                                |                 |                      |                  |            |            |            |
| MD 150 ns galectin-4-lactose | <b>galectin-4N/linker</b>      |                 |                      | <b>time (ns)</b> |            |            |            |
|                              | <b>Donor</b>                   | <b>Acceptor</b> | <b>Occupancy (%)</b> | <b>100</b>       | <b>150</b> | <b>200</b> | <b>250</b> |
|                              | 8GLY( H )                      | 153GLN(OE1)     | 14.3                 | 0                | 18         | 25         | 100        |
|                              | 13TYR(HH )                     | 174GLN(OE1)     | 20.6                 | 51               | 11         | 0          | 0          |
|                              | 13TYR(HH )                     | 171HIS( O )     | 11.3                 | 0                | 21         | 13         | 0          |
|                              | 148ASN(D22)                    | 171HIS(ND1)     | 89                   | 90               | 98         | 78         | 100        |
|                              | 156ARG( H )                    | 8 GLY( O )      | 26.6                 | 80               | 0          | 0          | 0          |
|                              | 156ARG(H12)                    | 9 TYR( O )      | 23.6                 | 67               | 4          | 0          | 0          |
|                              | 171HIS(HE2)                    | 102GLU(OE1)     | 50.5                 | 36               | 96         | 20         | 100        |
|                              |                                |                 |                      |                  |            |            |            |
|                              | <b>galectin-4C/linker</b>      |                 |                      | <b>Time (ns)</b> |            |            |            |
|                              | <b>Donor</b>                   | <b>Acceptor</b> | <b>Occupancy (%)</b> | <b>100</b>       | <b>150</b> | <b>200</b> | <b>250</b> |
|                              | 175GLN(E22)                    | 183GLU(OE2)     | 19.6                 | 2                | 20         | 36         | 0          |
|                              | 175GLN(E22)                    | 183GLU(OE1)     | 17.6                 | 7                | 23         | 22         | 0          |
|                              | 178SER(HG )                    | 206ARG(NH1)     | 91.7                 | 92               | 90         | 92         | 100        |
|                              | 178SER(HG )                    | 180PRO( O )     | 96.3                 | 94               | 97         | 97         | 100        |
|                              | 205ARG(HE )                    | 173HIS( O )     | 73.8                 | 73               | 74         | 75         | 0          |
| 205ARG(H12)                  | 177ASN(OD1)                    | 10.3            | 9                    | 21               | 1          | 0          |            |
| 205ARG(H22)                  | 177ASN(OD1)                    | 53.2            | 46                   | 54               | 60         | 100        |            |

|  |                                |                 |                      |                  |            |            |            |
|--|--------------------------------|-----------------|----------------------|------------------|------------|------------|------------|
|  | 205ARG(H22)                    | 176LEU( O )     | 26.2                 | 27               | 35         | 17         | 0          |
|  | 205ARG(H22)                    | 173HIS( O )     | 44.2                 | 45               | 34         | 54         | 100        |
|  |                                |                 |                      |                  |            |            |            |
|  | <b>galectin-4N/galectin-4C</b> |                 |                      | <b>Time (ns)</b> |            |            |            |
|  | <b>Donor</b>                   | <b>Acceptor</b> | <b>Occupancy (%)</b> | <b>100</b>       | <b>150</b> | <b>200</b> | <b>250</b> |
|  | 36GLN(E22)                     | 181THR( O )     | 65.8                 | 43               | 92         | 62         | 100        |
|  | 145GLN(E22)                    | 183GLU( O )     | 44.9                 | 68               | 41         | 26         | 0          |
|  | 181THR(HG1)                    | 102GLU(OE2)     | 70.8                 | 67               | 91         | 53         | 100        |
|  | 181THR(HG1)                    | 102GLU(OE1)     | 34.2                 | 32               | 13         | 58         | 0          |
|  | 183GLU( H )                    | 145GLN(OE1)     | 24.6                 | 56               | 11         | 7          | 0          |

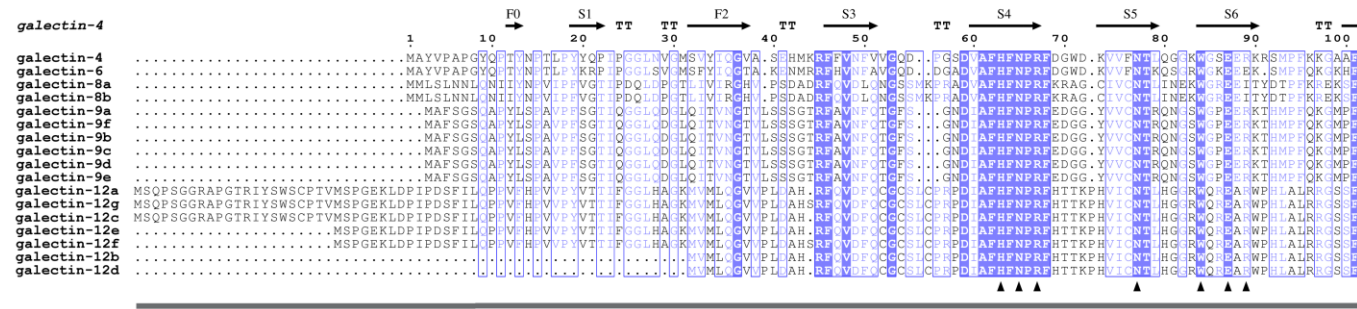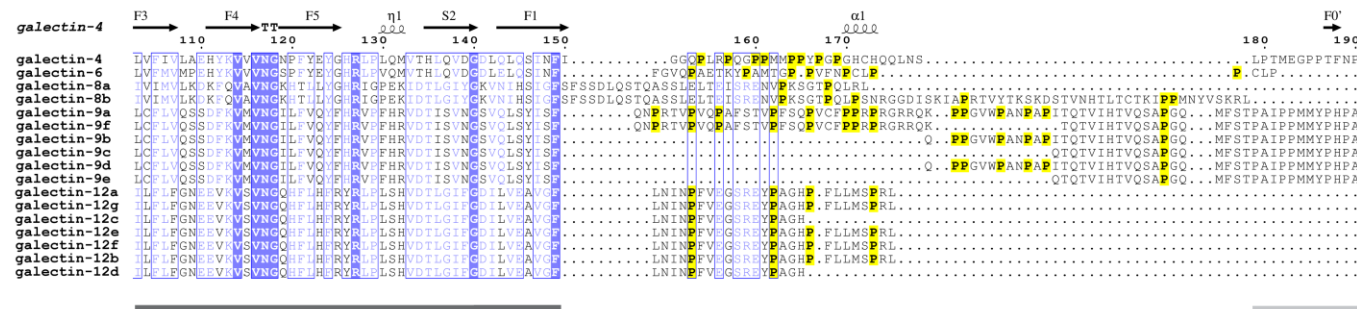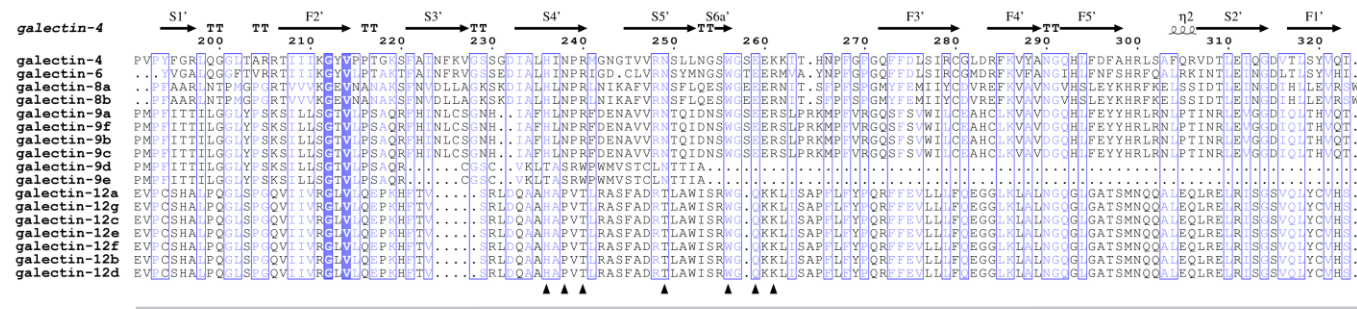

■ galectin-4N ■ galectin-4C

## Supplementary Figure S1

### Sequential alignment of the tandem-repeat galectins

Tandem-repeat galectins-6, -8, -9 and -12 and their respective isoforms were aligned against galectin-4 sequence. Marked with ▲ are the residues belonging to the carbohydrate-binding site. Galectin-4 secondary structure elements are placed above the alignment. Highlighted with a blue background and box are identical and similar residues, respectively. Marked with a yellow background are proline residues belonging to the linker-peptide regions.



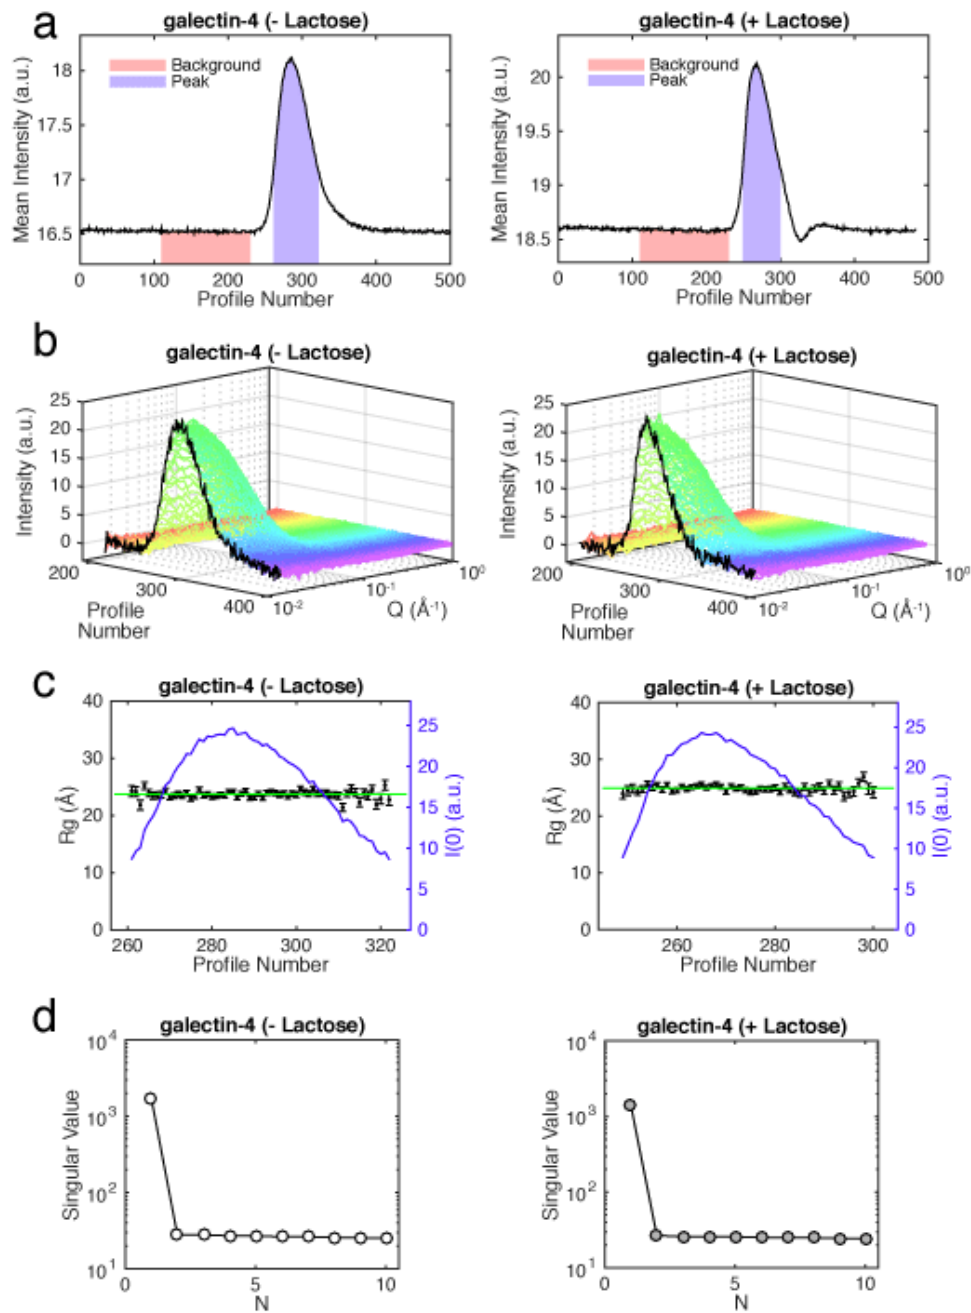

## Supplementary Figure S2

Processing SEC-SAXS separations of galectin-4 in the presence and absence of lactose.

(a) SAXS/WAXS profiles corresponding to buffer background and sample were identified by examination of the mean x-ray intensity elution profiles. In the presence (+) and absence (-) of lactose, galectin-4 elutes as a single peak. (b) For each separation, the profiles in the background region were averaged together and subtracted from the remaining profiles. (c) The peak regions were analysed to verify their homogeneity before averaging. The radius of gyration ( $R_g$ ) and forward scattering  $I(0)$  were found for each background-subtracted profile by Guinier analysis <sup>1</sup>. The apparent radius of gyration is constant through the peak (average value, solid green line) in both separations, showing the data to be free from concentration-dependent effects or incomplete separation that can sometimes be seen in SEC-SAXS data <sup>2</sup>. (d) Singular value decomposition (SVD) of each peak region identifies only one significant component, justifying the use of the average scattering profile for downstream analysis (see main text).

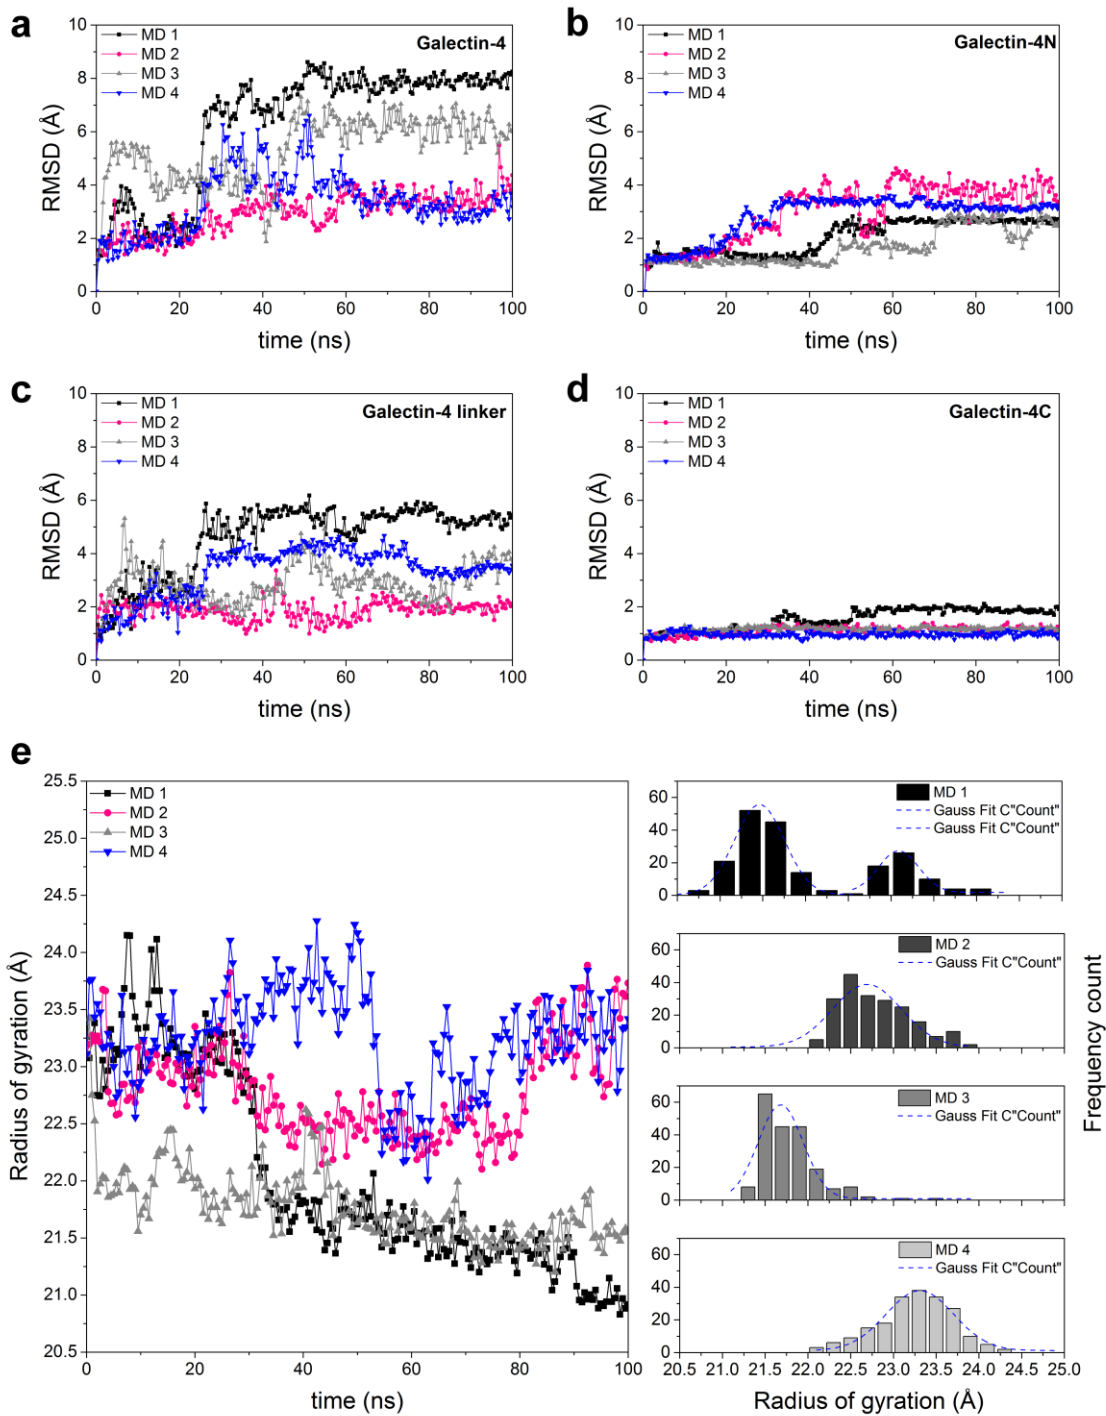

### Supplementary Figure S3

RMSD plots and radius of gyration histogram for MD simulations without lactose

RMSD plots for MD1, MD2, MD3 and MD4 simulations without lactose, 100 ns trajectories. RMSD plot of backbone atoms (a) full-length galectin-4, (b) galectin-4N domain, (c) galectin-4 linker and (d) galectin-4C. (e) Radius of gyration and distribution of frequency plots for MD1, MD2, MD3 and MD4.

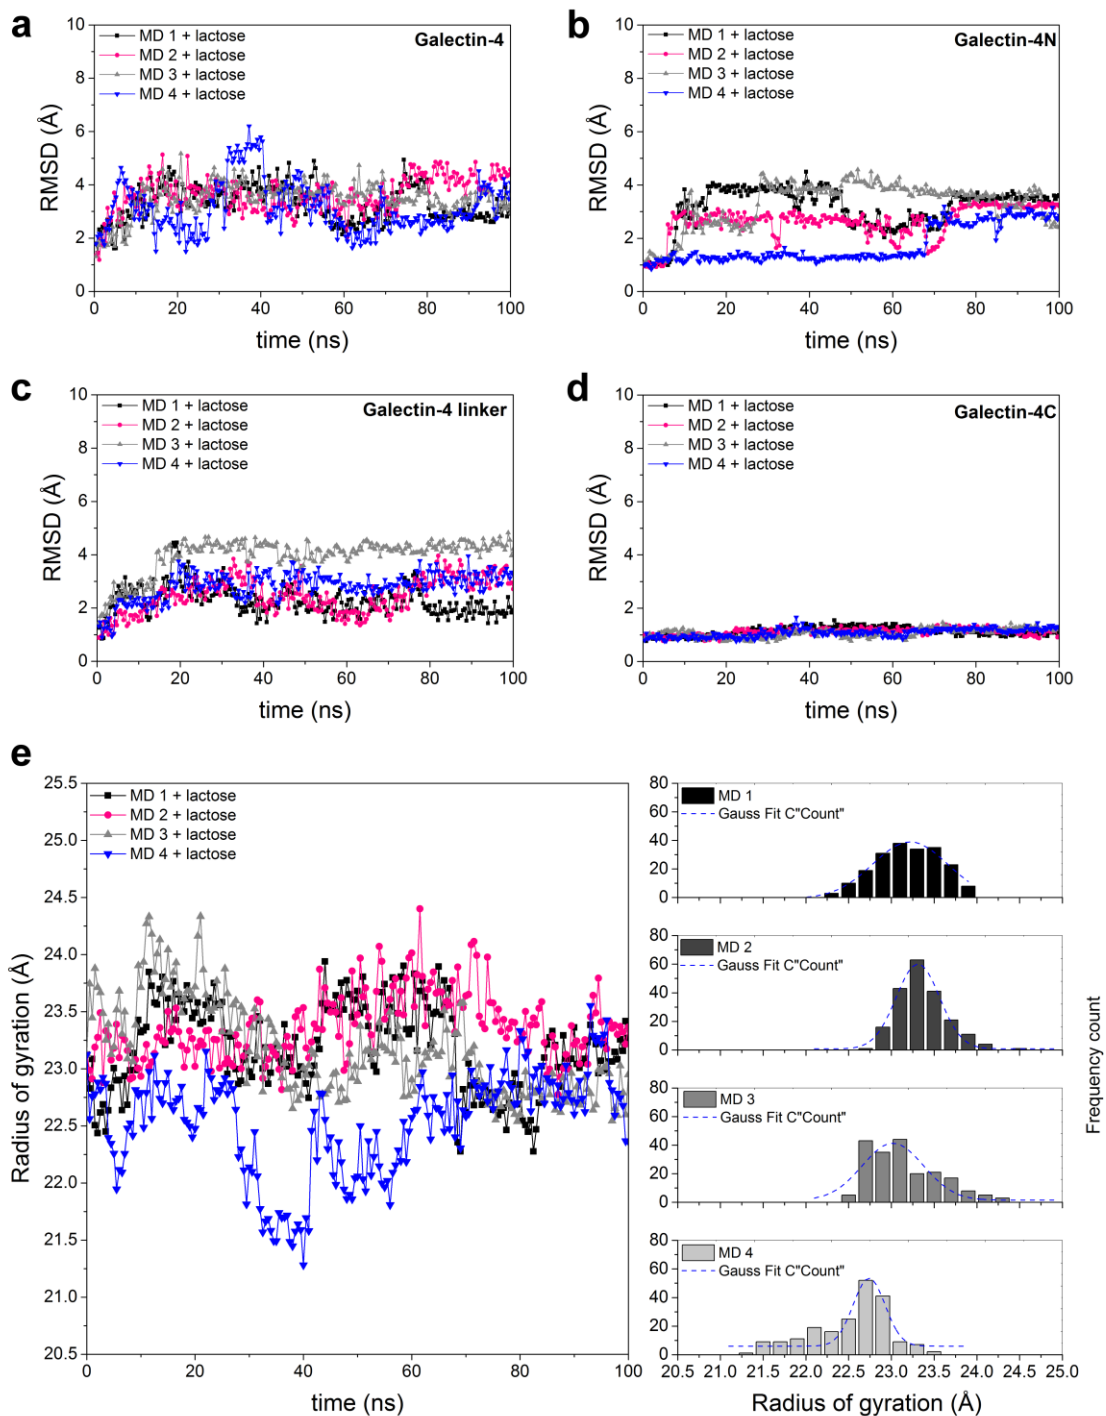

### Supplementary Figure S4

RMSD plots and radius of gyration histogram for MD simulations with lactose

RMSD plots for MD1, MD2, MD3 and MD4 simulations with lactose, 100 ns trajectories. RMSD plot of backbone atoms (a) full-length galectin-4, (b) galectin-4N domain, (c) galectin-4 linker and (d) galectin-4C. (e) Radius of gyration and distribution of frequency plots for MD1, MD2, MD3 and MD4.

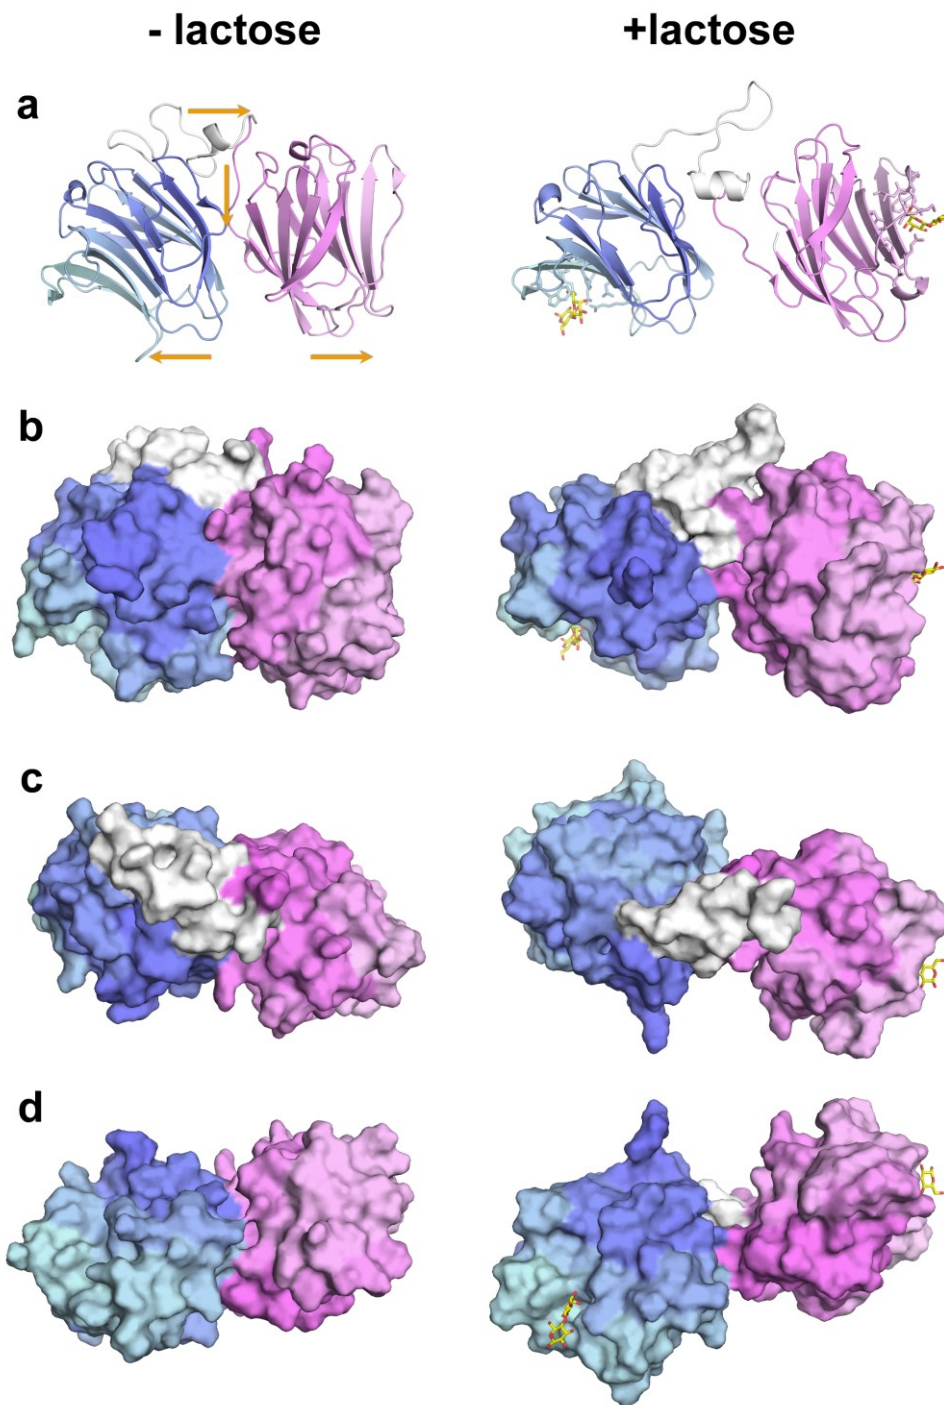

### Supplementary Figure S5

Structure of galectin-4 without and with lactose at 250 ns

Structure of galectin-4 and galectin-4-lactose at the end of MD simulations. Represented in blue is galectin-4N domain, in white, the linker-peptide, in pink the galectin-4C domain and the lactose molecule in yellow. (a) Cartoon representation with front view from the structures; Surface representation of the (b) front view, (c) top view and (d) bottom view. Arrows indicate the tendency of the movement between domains for galectin-4 without and with lactose. Contact area between interfaces galectin-4N/linker, galectin-4N/galectin-4C and galectin-4C/linker correspond to 540 Å<sup>2</sup>, 481 Å<sup>2</sup> and 334 Å<sup>2</sup> for galectin-4 without lactose and 325 Å<sup>2</sup>, 202 Å<sup>2</sup> and 428 Å<sup>2</sup>, for galectin-4 with lactose.

## Supplementary References

- 1 A, G. & G, F. *Small-Angle scattering of x-rays*. (John Wiley & Sons, 1955).
- 2 Mathew, E., Mirza, A. & Menhart, N. Liquid-chromatography-coupled SAXS for accurate sizing of aggregating proteins. *J Synchrotron Radiat* **11**, 314-318, doi:10.1107/S0909049504014086 (2004).
